# Supplementary material for: Dynamics of Liver Macrophage Subsets in a Novel Mouse Model of Non-Alcoholic Steatohepatitis Using C57BL/6 Mice
Source: MDPI journal article supplement (doi:10.3390/biomedicines11102659), 2023-09-28
Supplement: s1 [file s1]

| <b>Antibody</b>  | <b>Clone</b> | <b>Conjugate</b> | <b>Source</b> |
|------------------|--------------|------------------|---------------|
| Anti-CD11c       | HL3          | PE               | BD Pharmingen |
| Anti-CD11b/Mac-1 | M1/70        | APC-Cy7          | BD Pharmingen |
| Anti-CD45        | 30-F11       | APC              | BioLegend     |
| Anti-F4/80       | BM8          | PE               | BioLegend     |
| Anti-F4/80       | BM8          | FITC             | BioLegend     |
| Anti-TIM-4       | RMT4-54      | PE               | BioLegend     |
| Anti-Ly6C        | HK1.4        | FITC             | BioLegend     |

**Supplementary Table S1. Antibodies for flow cytometry.**

The antibodies for flow cytometry are listed. The antibodies were purchased from BD Pharmingen (San Diego, CA) or BioLegend (San Diego, CA).

| <b>Gene</b> | <b>Gene Symbol</b> | <b>Gene Name</b>                                | <b>Assay ID</b> |
|-------------|--------------------|-------------------------------------------------|-----------------|
| Hprt        | Hprt1              | hypoxanthine guanine phosphoribosyl transferase | Mm00446968_m1   |
| TNF-a       | Tnf                | tumor necrosis factor                           | Mm00443258_m1   |
| iNOS        | Nos2               | nitric oxide synthase 2, inducible              | Mm01309898_m1   |
| MCP-1       | Ccl2               | chemokine (C-C motif) ligand 2                  | Mm00441243_g1   |
| CD11c       | Itgax              | integrin alpha X                                | Mm00498698_m1   |
| Colla-1     | Colla1             | collagen, type 1, alpha 1                       | Mm00801666_g1   |
| TIMP-1      | Timp1              | tissue inhibitor of metalloproteinase 1         | Mm00441818_m1   |
| Tgfb-1      | Tgfb1              | transforming growth factor, beta 1              | Mm01178820_m1   |

**Supplementary Table S2. Primers for RT-qPCR.**

The primers were purchased from Applied Biosystems (Waltham, MA).

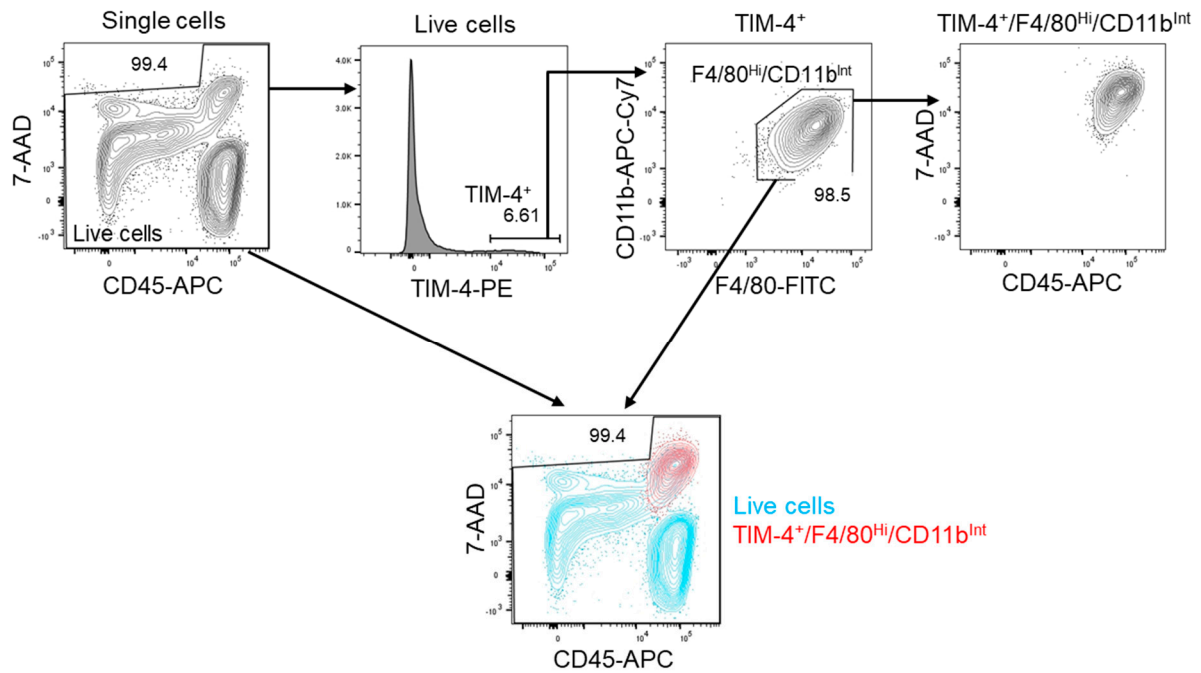

**Supplementary Figure S1. Representative flow cytometry data of CD45, TIM-4, F4/80, and CD11b expressions on live non-parenchymal cells of the livers from C57BL/6 mice.**

Single non-parenchymal cells of the livers from ND-fed C57BL/6 mice contained highly auto-fluorescent CD45<sup>+</sup> cells. Staining of these cells with an antibody to TIM-4, a specific marker of KCs, revealed that TIM-4<sup>+</sup> KCs were F4/80<sup>Hi</sup>/CD11b<sup>Int</sup> and highly auto-fluorescent CD45<sup>+</sup> cells.

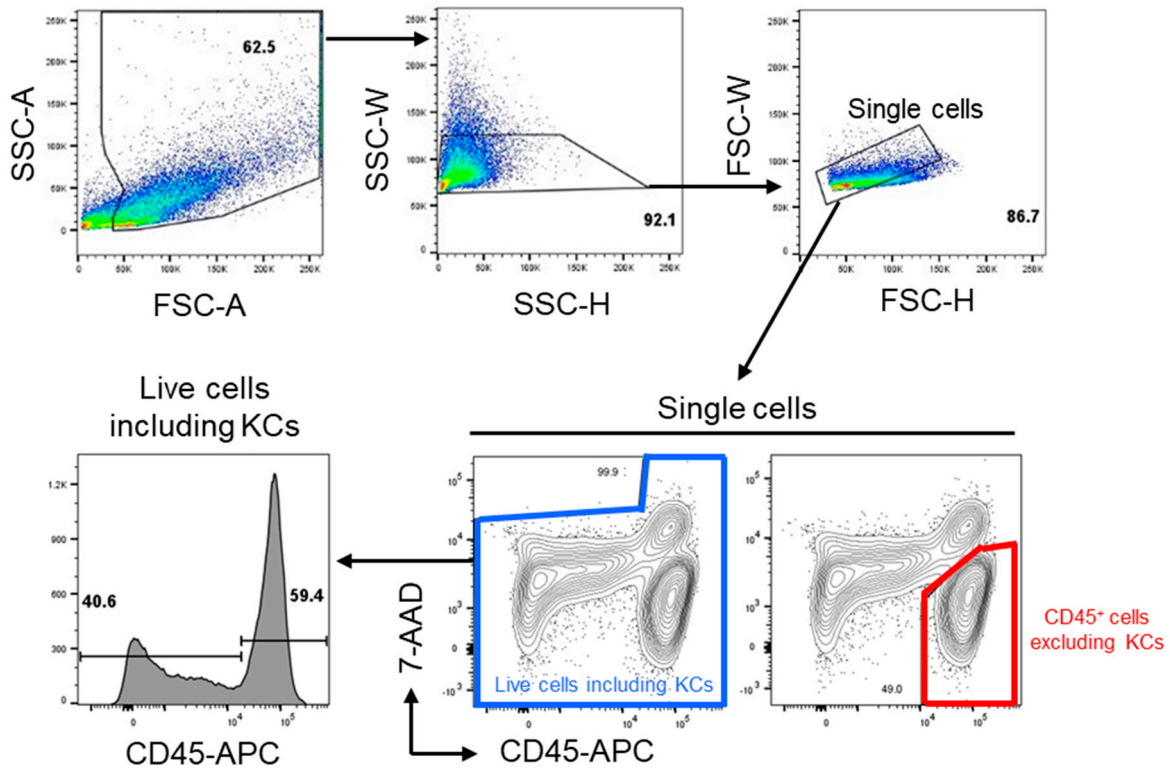

**Supplementary Figure S2. Gating strategy for flow cytometry analysis of non-parenchymal cell of the liver from C57BL/6 mice.**

Since KCs were highly auto-fluorescent CD45<sup>+</sup> cells (Figure S1), we used two different gating strategies to analyze CD45<sup>+</sup> cells, depending on whether the KCs were being assessed or not. To examine CD45<sup>+</sup> cells including KCs, single cells were first analyzed with a plot of CD45 and 7-AAD and gated on live cells including highly fluorescent CD45<sup>+</sup> cells (blue gate), followed by a histogram of CD45. To examine CD45<sup>+</sup> cells excluding KCs, single cells were gated on CD45 expressing cells excluding highly fluorescent CD45<sup>+</sup> cells (red gate).

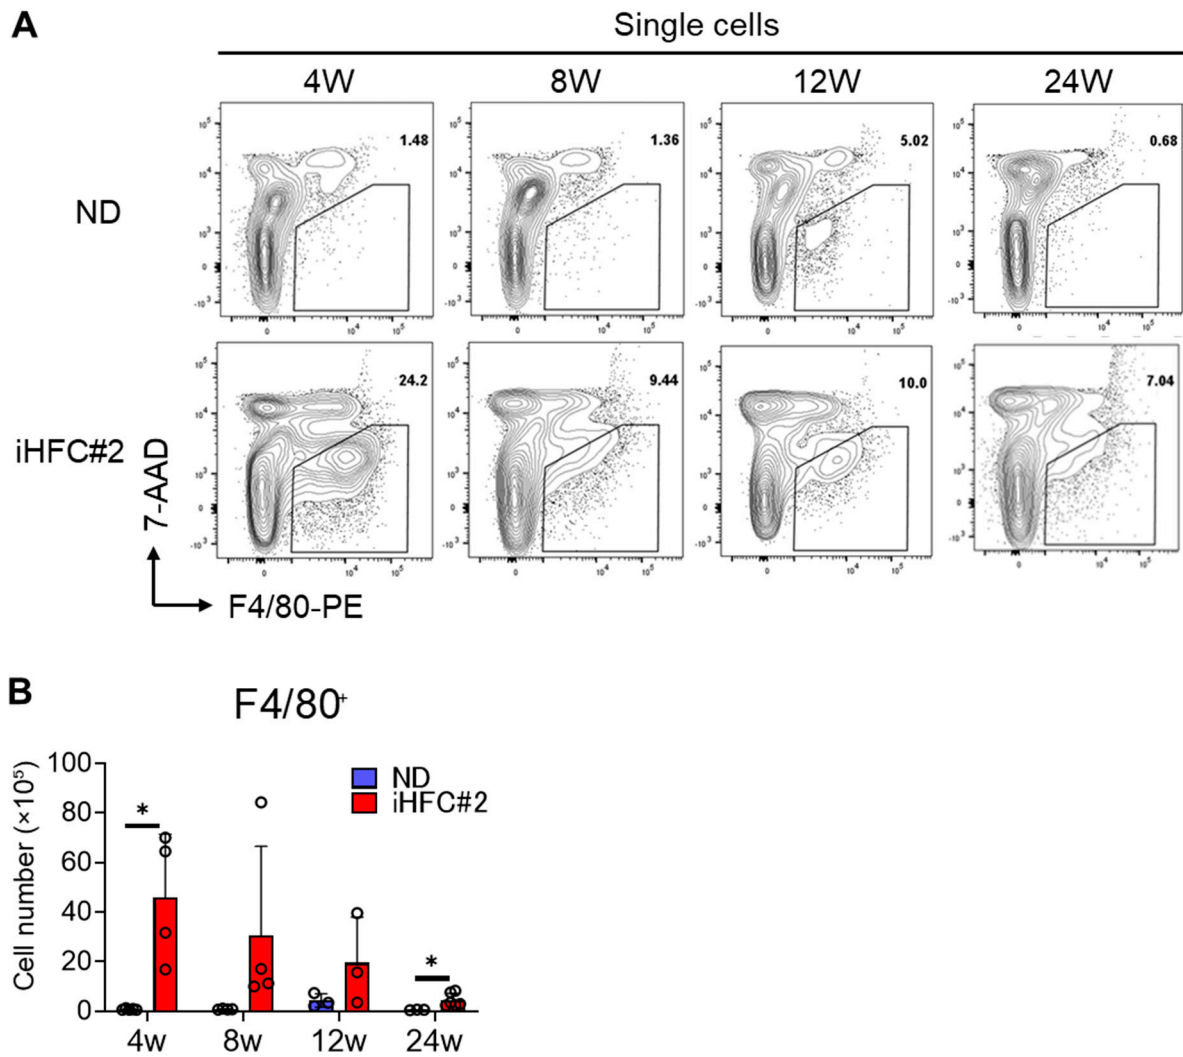

**Supplementary Figure S3. Gating strategy for flow cytometry analysis of F4/80<sup>+</sup> non-parenchymal cell, excluding KCs, of the liver from C57BL/6 mice.**

(A) Non-parenchymal cells were isolated from the liver from ND- or iHFC#2 diet-fed C57BL/6 mice for the indicated weeks. Single non-parenchymal cells were analyzed with a plot of F4/80 and 7-AAD and gated on live F4/80<sup>+</sup> cells excluding dead cells and highly fluorescent F4/80-positive KCs. Then, we examined the expression of Ly6C and CD11c on F4/80<sup>+</sup> recruited macrophages, as shown in Figure 6A. (B) The cell number of F4/80<sup>+</sup> recruited macrophages was determined by flow cytometry analysis done in Supplementary Fig. 3A (n = 3 or 6 per group). Data are shown as means ± SD. \**p* < 0.05
